# Supplementary material for: Surgical techniques for unilateral percutaneous vertebroplasty of high thoracic vertebrae determined by the shape of the ribs under X-ray fluoroscopyunder X-Ray Fluoroscopy
Source: Research Square preprint supplement (doi:10.21203/rs.3.rs-6843510/v1), 2025-07-01
Supplement: Supplementary file 1 [file 97b3aa7fca48b5053aebe52b.docx]

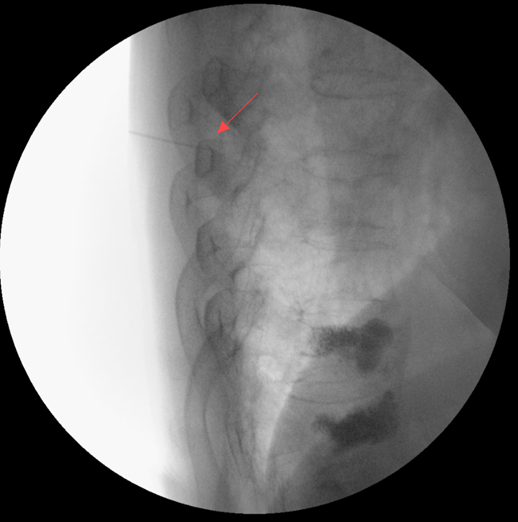


Figure S1 Temporary puncture positioning using a syringe needle under the C-arm,Determine the puncture height to ensure that the puncture passes through the pedicle and enters the vertebral body


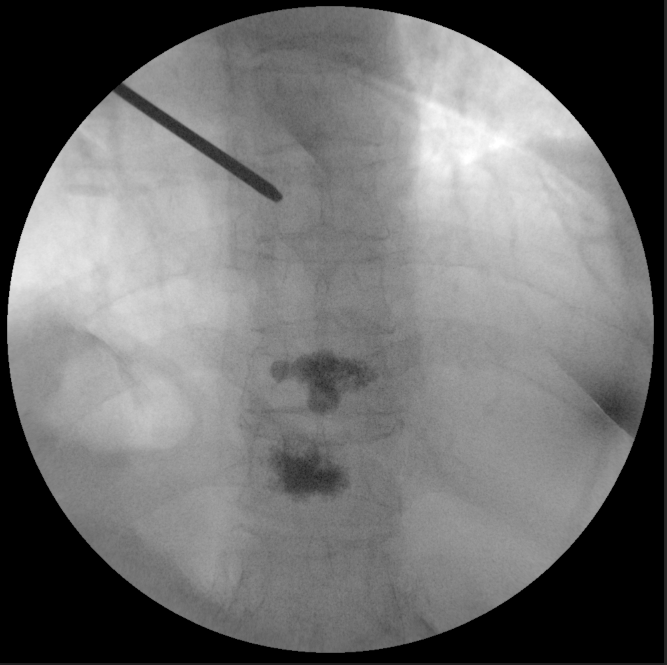


Figure S2 When the needle tip of the puncture needle on the lateral view reaches the posterior edge of the vertebral body, it is best not to break through the inner edge of the cat's eye on the frontal view


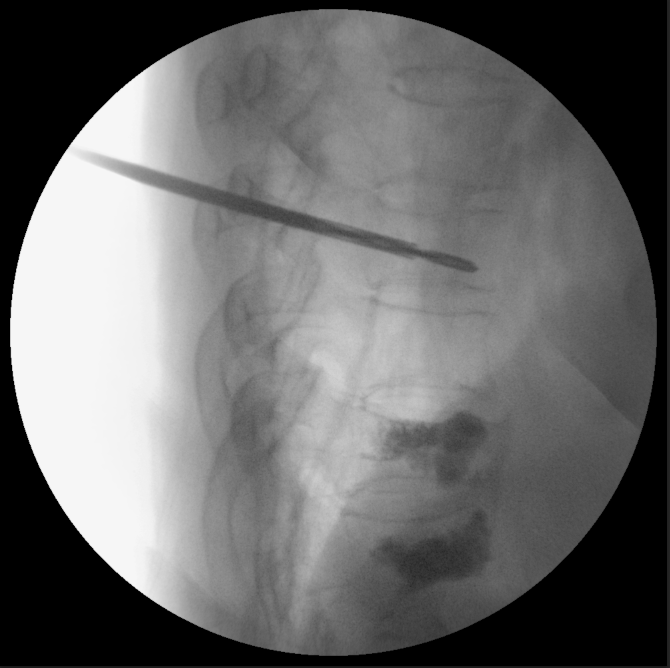


Figure S3 Stop needle insertion when the head of the expanded bone drill is located in the anterior 1/5 of the vertebral body


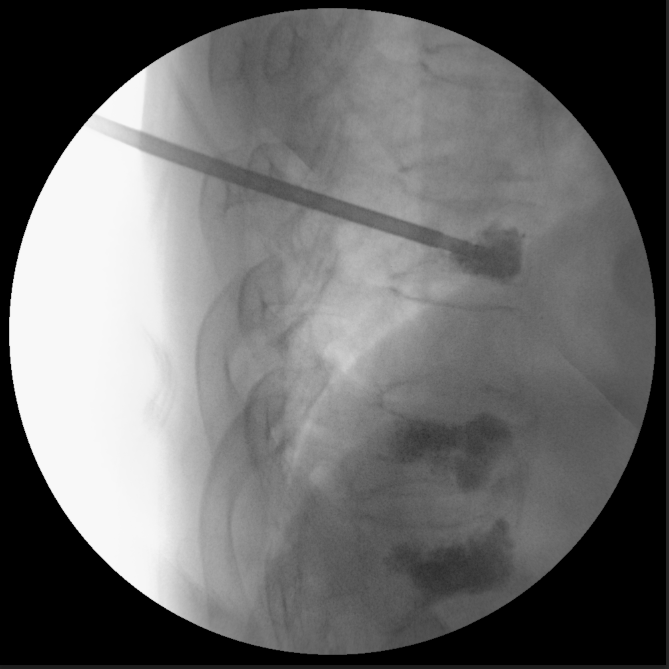


Figure S4 Inject bone cement under C-arm monitoring
